# Supplementary material for: Steganography in color images with random order of pixel selection and encrypted text message embedding
Source: PeerJ Comput Sci. 2021 Jan 28;7:e380. doi: 10.7717/peerj-cs.380 (PMC7924441; doi:10.7717/peerj-cs.380)
Supplement: Supplemental Information 3 — All the metrics of steganographic analysis. [file peerj-cs-07-380-s003.xlsx]

## Sheet: Stego100
	No	File Name	Stego image	Dimensions	Mean Square Error	Peak Signal to Noise Ratio	SSIM	Average Difference	Structural Content	Normalized Cross-Correlation	Maximum Difference	Laplacian Mean Squared Error	Normalized Absolute Error	Image Quality Index
	1	f1-256x256.bmp	f1-256x256s100.bmp	256x256	0.001587	76.125270	0.999985	0.000061	1.000002	0.999999	1.000000	0.000003	0.000010	1.000000
	2	f2-256x256.bmp	f2-256x256s100.bmp	256x256	0.001480	76.427886	0.999986	0.000107	1.000001	1.000000	1.000000	0.000045	0.000011	1.000000
	3	f3-256x256.bmp	f3-256x256s100.bmp	256x256	0.001541	76.252389	0.999993	0.000015	1.000002	0.999999	1.000000	0.000009	0.000012	1.000000
	4	f4-256x256.bmp	f4-256x256s100.bmp	256x256	0.001511	76.339251	0.999996	-0.000107	0.999998	1.000001	1.000000	0.000008	0.000014	1.000000
	5	f5-256x256.bmp	f5-256x256s100.bmp	256x256	0.001434	76.564324	0.999987	-0.000122	0.999999	1.000001	1.000000	0.000029	0.000009	1.000000
	6	f6-256x256.bmp	f6-256x256s100.bmp	256x256	0.001556	76.209601	0.999992	0.000336	1.000005	0.999998	1.000000	0.000005	0.000014	1.000000
	7	f7-256x256.bmp	f7-256x256s100.bmp	256x256	0.001633	76.001765	0.999993	0.000076	1.000001	0.999999	1.000000	0.000026	0.000013	1.000000
	8	f8-256x256.bmp	f8-256x256s100.bmp	256x256	0.001526	76.295603	0.999993	0.000000	1.000000	1.000000	1.000000	0.000008	0.000013	1.000000
	9	f1-512x512.bmp	f1-512x512s100.bmp	512x512	0.000404	82.063144	0.999996	0.000000	1.000000	1.000000	1.000000	0.000001	0.000003	1.000000
	10	f2-512x512.bmp	f2-512x512s100.bmp	512x512	0.000366	82.493490	0.999996	0.000000	1.000000	1.000000	1.000000	0.000017	0.000003	1.000000
	11	f3-512x512.bmp	f3-512x512s100.bmp	512x512	0.000397	82.145869	0.999997	0.000023	1.000000	1.000000	1.000000	0.000004	0.000003	1.000000
	12	f4-512x512.bmp	f4-512x512s100.bmp	512x512	0.000408	82.022365	0.999998	-0.000019	1.000000	1.000000	1.000000	0.000004	0.000004	1.000000
	13	f5-512x512.bmp	f5-512x512s100.bmp	512x512	0.000381	82.316203	0.999996	0.000008	1.000000	1.000000	1.000000	0.000024	0.000002	1.000000
	14	f6-512x512.bmp	f6-512x512s100.bmp	512x512	0.000347	82.725789	0.999998	0.000034	1.000001	1.000000	1.000000	0.000003	0.000003	1.000000
	15	f7-512x512.bmp	f7-512x512s100.bmp	512x512	0.000404	82.063144	0.999997	0.000038	1.000001	1.000000	1.000000	0.000078	0.000003	1.000000
	16	f8-512x512.bmp	f8-512x512s100.bmp	512x512	0.000370	82.448485	0.999998	0.000072	1.000001	0.999999	1.000000	0.000006	0.000003	1.000000

## Sheet: Stego200
	No	File Name	Stego image	Dimensions	Mean Square Error	Peak Signal to Noise Ratio	SSIM	Average Difference	Structural Content	Normalized Cross-Correlation	Maximum Difference	Laplacian Mean Squared Error	Normalized Absolute Error	Image Quality Index
	1	f1-256x256.bmp	f1-256x256s200.bmp	256x256	0.003098	73.220643	0.999973	-0.000015	1.000001	0.999999	1.000000	0.000006	0.000020	1.000000
	2	f2-256x256.bmp	f2-256x256s200.bmp	256x256	0.003128	73.178064	0.999971	0.000046	1.000000	1.000000	1.000000	0.000096	0.000024	1.000000
	3	f3-256x256.bmp	f3-256x256s200.bmp	256x256	0.003311	72.931006	0.999983	0.000351	1.000007	0.999997	1.000000	0.000020	0.000025	1.000000
	4	f4-256x256.bmp	f4-256x256s200.bmp	256x256	0.002945	73.440030	0.999993	0.000015	1.000000	1.000000	1.000000	0.000015	0.000027	1.000000
	5	f5-256x256.bmp	f5-256x256s200.bmp	256x256	0.003113	73.199301	0.999975	-0.000275	0.999998	1.000001	1.000000	0.000063	0.000019	1.000000
	6	f6-256x256.bmp	f6-256x256s200.bmp	256x256	0.003387	72.832073	0.999981	0.000519	1.000007	0.999996	1.000000	0.000010	0.000030	1.000000
	7	f7-256x256.bmp	f7-256x256s200.bmp	256x256	0.003220	73.052778	0.999986	0.000229	1.000003	0.999998	1.000000	0.000050	0.000025	1.000000
	8	f8-256x256.bmp	f8-256x256s200.bmp	256x256	0.003021	73.328951	0.999987	0.000275	1.000005	0.999997	1.000000	0.000015	0.000026	1.000000
	9	f1-512x512.bmp	f1-512x512s200.bmp	512x512	0.000801	79.094010	0.999993	0.000023	1.000000	1.000000	1.000000	0.000003	0.000005	1.000000
	10	f2-512x512.bmp	f2-512x512s200.bmp	512x512	0.000767	79.284242	0.999991	0.000050	1.000001	0.999999	1.000000	0.000036	0.000006	1.000000
	11	f3-512x512.bmp	f3-512x512s200.bmp	512x512	0.000755	79.349551	0.999994	0.000008	1.000000	1.000000	1.000000	0.000009	0.000006	1.000000
	12	f4-512x512.bmp	f4-512x512s200.bmp	512x512	0.000805	79.073378	0.999997	-0.000011	1.000000	1.000000	1.000000	0.000008	0.000007	1.000000
	13	f5-512x512.bmp	f5-512x512s200.bmp	512x512	0.000725	79.528667	0.999992	0.000031	1.000000	1.000000	1.000000	0.000046	0.000004	1.000000
	14	f6-512x512.bmp	f6-512x512s200.bmp	512x512	0.000721	79.551585	0.999995	0.000027	1.000001	1.000000	1.000000	0.000006	0.000006	1.000000
	15	f7-512x512.bmp	f7-512x512s200.bmp	512x512	0.000843	78.872280	0.999993	0.000019	1.000001	1.000000	1.000000	0.000162	0.000007	1.000000
	16	f8-512x512.bmp	f8-512x512s200.bmp	512x512	0.000732	79.483191	0.999996	0.000137	1.000002	0.999999	1.000000	0.000011	0.000006	1.000000

## Sheet: Stego300
	No	File Name	Stego image	Dimensions	Mean Square Error	Peak Signal to Noise Ratio	SSIM	Average Difference	Structural Content	Normalized Cross-Correlation	Maximum Difference	Laplacian Mean Squared Error	Normalized Absolute Error	Image Quality Index
	1	f1-256x256.bmp	f1-256x256s300.bmp	256x256	0.004761	71.354057	0.999959	-0.000366	0.999997	1.000001	1.000000	0.000009	0.000031	1.000000
	2	f2-256x256.bmp	f2-256x256s300.bmp	256x256	0.004837	71.285010	0.999956	-0.000168	0.999997	1.000001	1.000000	0.000149	0.000037	1.000000
	3	f3-256x256.bmp	f3-256x256s300.bmp	256x256	0.004913	71.217044	0.999975	0.000183	1.000003	0.999998	1.000000	0.000030	0.000038	1.000000
	4	f4-256x256.bmp	f4-256x256s300.bmp	256x256	0.004440	71.656673	0.999989	-0.000015	1.000000	1.000000	1.000000	0.000023	0.000040	1.000000
	5	f5-256x256.bmp	f5-256x256s300.bmp	256x256	0.004623	71.481177	0.999962	-0.000290	0.999998	1.000001	1.000000	0.000094	0.000029	1.000000
	6	f6-256x256.bmp	f6-256x256s300.bmp	256x256	0.004776	71.340160	0.999973	0.000534	1.000008	0.999996	1.000000	0.000014	0.000042	1.000000
	7	f7-256x256.bmp	f7-256x256s300.bmp	256x256	0.004745	71.367999	0.999980	0.000137	1.000004	0.999998	1.000000	0.000074	0.000037	1.000000
	8	f8-256x256.bmp	f8-256x256s300.bmp	256x256	0.004608	71.495533	0.999981	0.000214	1.000004	0.999998	1.000000	0.000024	0.000039	1.000000
	9	f1-512x512.bmp	f1-512x512s300.bmp	512x512	0.001163	77.473204	0.999989	0.000004	1.000000	1.000000	1.000000	0.000004	0.000007	1.000000
	10	f2-512x512.bmp	f2-512x512s300.bmp	512x512	0.001129	77.603286	0.999987	0.000023	1.000001	1.000000	1.000000	0.000054	0.000009	1.000000
	11	f3-512x512.bmp	f3-512x512s300.bmp	512x512	0.001110	77.677273	0.999992	0.000034	1.000000	1.000000	1.000000	0.000013	0.000009	1.000000
	12	f4-512x512.bmp	f4-512x512s300.bmp	512x512	0.001205	77.319332	0.999995	-0.000038	1.000000	1.000000	1.000000	0.000012	0.000011	1.000000
	13	f5-512x512.bmp	f5-512x512s300.bmp	512x512	0.001087	77.767754	0.999988	-0.000065	0.999999	1.000000	1.000000	0.000069	0.000007	1.000000
	14	f6-512x512.bmp	f6-512x512s300.bmp	512x512	0.001072	77.829140	0.999993	-0.000027	1.000000	1.000000	1.000000	0.000009	0.000009	1.000000
	15	f7-512x512.bmp	f7-512x512s300.bmp	512x512	0.001293	77.014206	0.999990	0.000034	1.000001	1.000000	1.000000	0.000250	0.000010	1.000000
	16	f8-512x512.bmp	f8-512x512s300.bmp	512x512	0.001064	77.860161	0.999994	0.000156	1.000003	0.999999	1.000000	0.000016	0.000009	1.000000

## Sheet: Stego400
	No	File Name	Stego image	Dimensions	Mean Square Error	Peak Signal to Noise Ratio	SSIM	Average Difference	Structural Content	Normalized Cross-Correlation	Maximum Difference	Laplacian Mean Squared Error	Normalized Absolute Error	Image Quality Index
	1	f1-256x256.bmp	f1-256x256s400.bmp	256x256	0.006363	70.094242	0.999944	-0.000290	0.999998	1.000001	1.000000	0.000012	0.000041	1.000000
	2	f2-256x256.bmp	f2-256x256s400.bmp	256x256	0.006531	69.981165	0.999939	-0.000031	1.000000	1.000000	1.000000	0.000202	0.000049	1.000000
	3	f3-256x256.bmp	f3-256x256s400.bmp	256x256	0.006470	70.021944	0.999967	0.000488	1.000006	0.999997	1.000000	0.000040	0.000050	1.000000
	4	f4-256x256.bmp	f4-256x256s400.bmp	256x256	0.006027	70.329632	0.999985	0.000046	1.000003	0.999998	1.000000	0.000032	0.000054	1.000000
	5	f5-256x256.bmp	f5-256x256s400.bmp	256x256	0.006226	70.189001	0.999949	0.000000	1.000002	0.999999	1.000000	0.000126	0.000038	1.000000
	6	f6-256x256.bmp	f6-256x256s400.bmp	256x256	0.006454	70.032199	0.999963	0.000687	1.000012	0.999994	1.000000	0.000019	0.000057	1.000000
	7	f7-256x256.bmp	f7-256x256s400.bmp	256x256	0.006363	70.094242	0.999972	0.000290	1.000007	0.999996	1.000000	0.000099	0.000049	1.000000
	8	f8-256x256.bmp	f8-256x256s400.bmp	256x256	0.006332	70.115122	0.999973	0.000320	1.000006	0.999997	1.000000	0.000033	0.000054	1.000000
	9	f1-512x512.bmp	f1-512x512s400.bmp	512x512	0.001549	76.230942	0.999985	0.000038	1.000000	1.000000	1.000000	0.000005	0.000010	1.000000
	10	f2-512x512.bmp	f2-512x512s400.bmp	512x512	0.001495	76.383342	0.999982	0.000092	1.000001	0.999999	1.000000	0.000071	0.000011	1.000000
	11	f3-512x512.bmp	f3-512x512s400.bmp	512x512	0.001495	76.383342	0.999990	0.000122	1.000002	0.999999	1.000000	0.000017	0.000012	1.000000
	12	f4-512x512.bmp	f4-512x512s400.bmp	512x512	0.001560	76.198970	0.999994	-0.000004	1.000001	1.000000	1.000000	0.000016	0.000014	1.000000
	13	f5-512x512.bmp	f5-512x512s400.bmp	512x512	0.001442	76.541285	0.999985	-0.000038	0.999999	1.000000	1.000000	0.000091	0.000009	1.000000
	14	f6-512x512.bmp	f6-512x512s400.bmp	512x512	0.001453	76.506953	0.999991	0.000011	1.000001	1.000000	1.000000	0.000013	0.000013	1.000000
	15	f7-512x512.bmp	f7-512x512s400.bmp	512x512	0.001694	75.842373	0.999987	0.000107	1.000002	0.999999	1.000000	0.000325	0.000013	1.000000
	16	f8-512x512.bmp	f8-512x512s400.bmp	512x512	0.001461	76.484215	0.999992	0.000248	1.000004	0.999998	1.000000	0.000022	0.000012	1.000000

## Sheet: Stego500
	No	File Name	Stego image	Dimensions	Mean Square Error	Peak Signal to Noise Ratio	SSIM	Average Difference	Structural Content	Normalized Cross-Correlation	Maximum Difference	Laplacian Mean Squared Error	Normalized Absolute Error	Image Quality Index
	1	f1-256x256.bmp	f1-256x256s500.bmp	256x256	0.008118	69.036487	0.999930	-0.000397	0.999996	1.000002	1.000000	0.000015	0.000052	1.000000
	2	f2-256x256.bmp	f2-256x256s500.bmp	256x256	0.008057	69.069264	0.999925	0.000061	1.000002	0.999999	1.000000	0.000249	0.000061	1.000000
	3	f3-256x256.bmp	f3-256x256s500.bmp	256x256	0.008240	68.971665	0.999959	0.000275	1.000003	0.999998	1.000000	0.000051	0.000063	1.000000
	4	f4-256x256.bmp	f4-256x256s500.bmp	256x256	0.007584	69.332039	0.999982	0.000137	1.000006	0.999997	1.000000	0.000040	0.000068	1.000000
	5	f5-256x256.bmp	f5-256x256s500.bmp	256x256	0.007904	69.152305	0.999935	-0.000031	1.000002	0.999999	1.000000	0.000159	0.000049	1.000000
	6	f6-256x256.bmp	f6-256x256s500.bmp	256x256	0.007996	69.102290	0.999954	0.000702	1.000013	0.999993	1.000000	0.000024	0.000070	1.000000
	7	f7-256x256.bmp	f7-256x256s500.bmp	256x256	0.008026	69.085745	0.999965	0.000183	1.000006	0.999997	1.000000	0.000125	0.000062	1.000000
	8	f8-256x256.bmp	f8-256x256s500.bmp	256x256	0.008118	69.036487	0.999965	0.000488	1.000010	0.999995	1.000000	0.000042	0.000069	1.000000
	9	f1-512x512.bmp	f1-512x512s500.bmp	512x512	0.001904	75.335197	0.999982	-0.000027	1.000000	1.000000	1.000000	0.000007	0.000012	1.000000
	10	f2-512x512.bmp	f2-512x512s500.bmp	512x512	0.001865	75.423114	0.999978	0.000065	1.000001	0.999999	1.000000	0.000088	0.000014	1.000000
	11	f3-512x512.bmp	f3-512x512s500.bmp	512x512	0.001877	75.396552	0.999987	0.000122	1.000002	0.999999	1.000000	0.000021	0.000014	1.000000
	12	f4-512x512.bmp	f4-512x512s500.bmp	512x512	0.001923	75.291897	0.999992	-0.000084	1.000000	1.000000	1.000000	0.000020	0.000017	1.000000
	13	f5-512x512.bmp	f5-512x512s500.bmp	512x512	0.001816	75.540133	0.999981	-0.000053	0.999999	1.000000	1.000000	0.000114	0.000011	1.000000
	14	f6-512x512.bmp	f6-512x512s500.bmp	512x512	0.001812	75.549267	0.999989	-0.000034	1.000000	1.000000	1.000000	0.000016	0.000016	1.000000
	15	f7-512x512.bmp	f7-512x512s500.bmp	512x512	0.002140	74.826574	0.999983	0.000095	1.000002	0.999999	1.000000	0.000411	0.000017	1.000000
	16	f8-512x512.bmp	f8-512x512s500.bmp	512x512	0.001827	75.512848	0.999990	0.000248	1.000004	0.999998	1.000000	0.000028	0.000016	1.000000

## Sheet: Stego1000
	No	File Name	Stego image	Dimensions	Mean Square Error	Peak Signal to Noise Ratio	SSIM	Average Difference	Structural Content	Normalized Cross-Correlation	Maximum Difference	Laplacian Mean Squared Error	Normalized Absolute Error	Image Quality Index
	1	f1-256x256.bmp	f1-256x256s1000.bmp	256x256	0.016464	65.965388	0.999859	-0.000687	0.999995	1.000002	1.000000	0.000031	0.000106	1.000000
	2	f2-256x256.bmp	f2-256x256s1000.bmp	256x256	0.015305	66.282594	0.999856	-0.000107	0.999996	1.000002	1.000000	0.000483	0.000116	1.000000
	3	f3-256x256.bmp	f3-256x256s1000.bmp	256x256	0.016159	66.046643	0.999917	0.000259	1.000006	0.999997	1.000000	0.000100	0.000124	1.000000
	4	f4-256x256.bmp	f4-256x256s1000.bmp	256x256	0.015839	66.133629	0.999958	0.001068	1.000018	0.999990	1.000000	0.000084	0.000143	1.000001
	5	f5-256x256.bmp	f5-256x256s1000.bmp	256x256	0.015823	66.137815	0.999865	-0.000443	0.999998	1.000001	1.000000	0.000318	0.000098	1.000000
	6	f6-256x256.bmp	f6-256x256s1000.bmp	256x256	0.015579	66.205345	0.999910	0.001266	1.000025	0.999987	1.000000	0.000045	0.000137	1.000000
	7	f7-256x256.bmp	f7-256x256s1000.bmp	256x256	0.015717	66.167231	0.999929	0.000519	1.000012	0.999994	1.000000	0.000243	0.000122	1.000000
	8	f8-256x256.bmp	f8-256x256s1000.bmp	256x256	0.015289	66.286926	0.999939	0.001099	1.000017	0.999991	1.000000	0.000078	0.000130	1.000000
	9	f1-512x512.bmp	f1-512x512s1000.bmp	512x512	0.003708	72.439540	0.999969	-0.000252	0.999997	1.000001	1.000000	0.000013	0.000024	1.000000
	10	f2-512x512.bmp	f2-512x512s1000.bmp	512x512	0.003826	72.303193	0.999956	0.000156	1.000003	0.999999	1.000000	0.000182	0.000029	1.000000
	11	f3-512x512.bmp	f3-512x512s1000.bmp	512x512	0.003601	72.566483	0.999975	0.000412	1.000006	0.999997	1.000000	0.000041	0.000028	0.999999
	12	f4-512x512.bmp	f4-512x512s1000.bmp	512x512	0.003979	72.133360	0.999984	-0.000195	0.999999	1.000000	1.000000	0.000041	0.000036	1.000000
	13	f5-512x512.bmp	f5-512x512s1000.bmp	512x512	0.003731	72.412814	0.999960	0.000122	1.000001	0.999999	1.000000	0.000232	0.000023	1.000000
	14	f6-512x512.bmp	f6-512x512s1000.bmp	512x512	0.003601	72.566483	0.999978	0.000107	1.000003	0.999998	1.000000	0.000031	0.000032	1.000000
	15	f7-512x512.bmp	f7-512x512s1000.bmp	512x512	0.004047	72.059049	0.999968	0.000248	1.000004	0.999998	1.000000	0.000779	0.000031	1.000000
	16	f8-512x512.bmp	f8-512x512s1000.bmp	512x512	0.003792	72.342339	0.999979	0.000519	1.000007	0.999996	1.000000	0.000058	0.000032	1.000000

## Sheet: Stego1500
	No	File Name	Stego image	Dimensions	Mean Square Error	Peak Signal to Noise Ratio	SSIM	Average Difference	Structural Content	Normalized Cross-Correlation	Maximum Difference	Laplacian Mean Squared Error	Normalized Absolute Error	Image Quality Index
	1	f1-256x256.bmp	f1-256x256s1500.bmp	256x256	0.024536	64.232742	0.999794	-0.001251	0.999986	1.000006	1.000000	0.000046	0.000158	1.000000
	2	f2-256x256.bmp	f2-256x256s1500.bmp	256x256	0.022690	64.572493	0.999786	0.000046	0.999998	1.000000	1.000000	0.000714	0.000171	1.000000
	3	f3-256x256.bmp	f3-256x256s1500.bmp	256x256	0.024078	64.314533	0.999881	0.000732	1.000015	0.999992	1.000000	0.000148	0.000185	1.000000
	4	f4-256x256.bmp	f4-256x256s1500.bmp	256x256	0.023544	64.411944	0.999940	0.001022	1.000019	0.999990	1.000000	0.000125	0.000213	1.000001
	5	f5-256x256.bmp	f5-256x256s1500.bmp	256x256	0.023972	64.333841	0.999795	0.000168	1.000006	0.999996	1.000000	0.000483	0.000148	1.000000
	6	f6-256x256.bmp	f6-256x256s1500.bmp	256x256	0.023544	64.411944	0.999867	0.001450	1.000032	0.999983	1.000000	0.000068	0.000207	1.000000
	7	f7-256x256.bmp	f7-256x256s1500.bmp	256x256	0.023132	64.488611	0.999896	0.000427	1.000016	0.999992	1.000000	0.000358	0.000180	1.000000
	8	f8-256x256.bmp	f8-256x256s1500.bmp	256x256	0.023010	64.511589	0.999908	0.001587	1.000022	0.999988	1.000000	0.000116	0.000196	1.000000
	9	f1-512x512.bmp	f1-512x512s1500.bmp	512x512	0.005615	70.637125	0.999953	-0.000343	0.999996	1.000002	1.000000	0.000020	0.000036	1.000000
	10	f2-512x512.bmp	f2-512x512s1500.bmp	512x512	0.005753	70.532189	0.999934	0.000389	1.000006	0.999997	1.000000	0.000274	0.000043	1.000000
	11	f3-512x512.bmp	f3-512x512s1500.bmp	512x512	0.005463	70.756773	0.999962	0.000481	1.000007	0.999996	1.000000	0.000062	0.000042	0.999999
	12	f4-512x512.bmp	f4-512x512s1500.bmp	512x512	0.005886	70.432544	0.999977	-0.000217	0.999998	1.000001	1.000000	0.000061	0.000053	1.000000
	13	f5-512x512.bmp	f5-512x512s1500.bmp	512x512	0.005650	70.610652	0.999939	0.000134	1.000001	0.999999	1.000000	0.000353	0.000035	1.000000
	14	f6-512x512.bmp	f6-512x512s1500.bmp	512x512	0.005501	70.726550	0.999967	0.000198	1.000004	0.999998	1.000000	0.000048	0.000048	1.000000
	15	f7-512x512.bmp	f7-512x512s1500.bmp	512x512	0.005989	70.357206	0.999953	0.000259	1.000005	0.999997	1.000000	0.001157	0.000046	1.000000
	16	f8-512x512.bmp	f8-512x512s1500.bmp	512x512	0.005619	70.634175	0.999970	0.000607	1.000008	0.999996	1.000000	0.000086	0.000048	1.000000

## Sheet: Stego2000
	No	File Name	Stego image	Dimensions	Mean Square Error	Peak Signal to Noise Ratio	SSIM	Average Difference	Structural Content	Normalized Cross-Correlation	Maximum Difference	Laplacian Mean Squared Error	Normalized Absolute Error	Image Quality Index
	1	f1-256x256.bmp	f1-256x256s2000.bmp	256x256	0.032562	63.003659	0.999723	-0.001495	0.999983	1.000008	1.000000	0.000062	0.000209	1.000000
	2	f2-256x256.bmp	f2-256x256s2000.bmp	256x256	0.030289	63.317998	0.999715	0.000107	1.000004	0.999997	1.000000	0.000953	0.000229	1.000000
	3	f3-256x256.bmp	f3-256x256s2000.bmp	256x256	0.031754	63.112882	0.999845	0.000961	1.000019	0.999990	1.000000	0.000195	0.000244	1.000000
	4	f4-256x256.bmp	f4-256x256s2000.bmp	256x256	0.031494	63.148506	0.999921	0.000610	1.000011	0.999993	1.000000	0.000166	0.000284	1.000001
	5	f5-256x256.bmp	f5-256x256s2000.bmp	256x256	0.031296	63.175946	0.999732	-0.000015	1.000003	0.999998	1.000000	0.000631	0.000194	1.000000
	6	f6-256x256.bmp	f6-256x256s2000.bmp	256x256	0.030823	63.242089	0.999825	0.001740	1.000037	0.999980	1.000000	0.000089	0.000270	1.000000
	7	f7-256x256.bmp	f7-256x256s2000.bmp	256x256	0.030640	63.267966	0.999862	0.000885	1.000024	0.999987	1.000000	0.000475	0.000238	1.000000
	8	f8-256x256.bmp	f8-256x256s2000.bmp	256x256	0.030563	63.278793	0.999878	0.001694	1.000023	0.999987	1.000000	0.000153	0.000261	1.000000
	9	f1-512x512.bmp	f1-512x512s2000.bmp	512x512	0.007530	69.362731	0.999936	-0.000450	0.999994	1.000003	1.000000	0.000027	0.000048	1.000000
	10	f2-512x512.bmp	f2-512x512s2000.bmp	512x512	0.007805	69.207147	0.999910	0.000450	1.000007	0.999996	1.000000	0.000370	0.000059	1.000000
	11	f3-512x512.bmp	f3-512x512s2000.bmp	512x512	0.007263	69.519533	0.999949	0.000496	1.000007	0.999996	1.000000	0.000083	0.000056	0.999999
	12	f4-512x512.bmp	f4-512x512s2000.bmp	512x512	0.007813	69.202903	0.999969	-0.000145	0.999999	1.000000	1.000000	0.000081	0.000071	1.000000
	13	f5-512x512.bmp	f5-512x512s2000.bmp	512x512	0.007599	69.323309	0.999917	0.000099	1.000001	0.999999	1.000000	0.000475	0.000047	1.000000
	14	f6-512x512.bmp	f6-512x512s2000.bmp	512x512	0.007313	69.489982	0.999955	0.000248	1.000005	0.999997	1.000000	0.000063	0.000064	1.000000
	15	f7-512x512.bmp	f7-512x512s2000.bmp	512x512	0.008007	69.096078	0.999938	0.000294	1.000006	0.999997	1.000000	0.001547	0.000062	1.000000
	16	f8-512x512.bmp	f8-512x512s2000.bmp	512x512	0.007710	69.260540	0.999958	0.000935	1.000013	0.999993	1.000000	0.000118	0.000066	1.000000
